# Supplementary material for: Dynamics of the blood plasma proteome during hyperacute HIV-1 infection
Source: Springer Nature journal article supplement (doi:10.1038/s41467-024-54848-0), 2024-12-04
Supplement: MOESM1 [file 41467_2024_54848_MOESM1_ESM.pdf]

## SUPPLEMENTARY INFORMATION

### Dynamics of the blood plasma proteome during hyperacute HIV-1 infection

Jamirah Nazziwa<sup>1,2</sup>, Eva Freyhult<sup>3</sup>, Mun-Gwan Hong<sup>4</sup>, Emil Johansson<sup>1,2</sup>, Filip Årman<sup>5</sup>, Jonathan Hare<sup>6,7</sup>, Kamini Gounder<sup>8,9,10</sup>, Melinda Rezeli<sup>5,11</sup>, Tirthankar Mohanty<sup>12</sup>, Sven Kjellström<sup>5</sup>, Anatoli Kamali<sup>7</sup>, Etienne Karita<sup>13</sup>, William Kilembe<sup>14</sup>, Matt A Price<sup>7,15</sup>, Pontiano Kaleebu<sup>16</sup>, Susan Allen<sup>13,14,17</sup>, Eric Hunter<sup>13,14,17</sup>, Thumbi Ndung'u<sup>8,9,10,18</sup>, Jill Gilmour<sup>19</sup>, Sarah L. Rowland-Jones<sup>20</sup>, Eduard Sanders<sup>21,22,23</sup>, Amin S. Hassan<sup>1,22,24§</sup>, and Joakim Esbjörnsson<sup>1,2,20§\*</sup>

<sup>1</sup>Department of Translational Medicine, Lund University, Sweden

<sup>2</sup>Lund University Virus Centre, Lund University, Sweden

<sup>3</sup>National Bioinformatics Infrastructure Sweden, Science for Life Laboratory, Department of Cell and Molecular Biology, Uppsala University, Uppsala, Sweden

<sup>4</sup>National Bioinformatics Infrastructure Sweden, Science for Life Laboratory, Department of Biochemistry and Biophysics, Stockholm University, Stockholm, Sweden

<sup>5</sup>BioMS–Swedish National Infrastructure for Biological Mass Spectrometry, Lund University, Lund, Sweden

<sup>6</sup>IAVI Human Immunology Laboratory, Imperial College, London, United Kingdom

<sup>7</sup>IAVI, New York, New York, USA, and Nairobi, Kenya

<sup>8</sup>Africa Health Research Institute, Durban, South Africa

<sup>9</sup>HIV Pathogenesis Programme, The Doris Duke Medical Research Institute, University of KwaZulu-Natal, Durban, South Africa

<sup>10</sup>Division of Infection and Immunity, University College London, London, United Kingdom

<sup>11</sup>Department of Biomedical Engineering, Faculty of Engineering, Lund University, Lund, Sweden

<sup>12</sup>Division of Infection Medicine, Department of Clinical Sciences Lund, Faculty of Medicine,  
Lund University, Lund, Sweden

<sup>13</sup>Center for Family Health Research, Kigali, Rwanda

<sup>14</sup>Center for Family Health Research, Lusaka, Zambia

<sup>15</sup>UCSF Department of Epidemiology and Biostatistics, San Francisco, California, USA

<sup>16</sup>Medical Research Council/Uganda Virus Research Institute and London School of Hygiene  
and Tropical Medicine, Uganda Research Unit, Uganda

<sup>17</sup>Department of Pathology & Laboratory Medicine, School of Medicine, Emory University,  
Atlanta, Georgia, USA

<sup>18</sup>Ragon Institute of Massachusetts General Hospital, Massachusetts Institute of Technology  
and Harvard University, Cambridge, Massachusetts, USA

<sup>19</sup>Department of Infectious Diseases, Infection and Immunity, Faculty of Medicine, Imperial  
College, London, United Kingdom

<sup>20</sup>Nuffield Department of Medicine, University of Oxford, UK

<sup>21</sup>Sir William Dunn School of Pathology, University of Oxford, UK

<sup>22</sup>KEMRI/Wellcome Trust Research Programme, Kilifi, Kenya

<sup>23</sup>The Aurum Institute, Johannesburg, South Africa

<sup>24</sup>Institute for Human Development, Aga Khan University, Nairobi, Kenya

These authors contributed equally: Amin S. Hassan. Joakim Esbjörnsson.

\*Correspondence and requests for materials should be addressed to J.E. (email:  
[joakim.esbjornsson@med.lu.se](mailto:joakim.esbjornsson@med.lu.se))

## SUPPLEMENTARY METHODS

### Sample preparation for LC-MS/MS analysis

#### *Neat plasma*

The protein digestion process was optimized for 1  $\mu$ l (1 mg/ml) of plasma. First, 50  $\mu$ l of digestion buffer (8 M urea, in 100 mM ammonium bicarbonate) was added to the plasma. Next, proteins were reduced with 5 mM Tris(2-carboxyethyl) phosphine, pH 7.0 for 60 minutes at 37 °C, and then alkylated with 25 mM iodoacetamide (Sigma) at room temperature for 30 minutes in the dark. The mixture was diluted with 100 mM ammonium bicarbonate to achieve a final urea concentration below 1.5 M, and trypsin (1/100, w/w, Sequencing Grade Modified Trypsin, Porcine; Promega) was added for overnight digestion (at least 9 hours) at 37 °C. Digestion was halted using 5% trifluoroacetic acid (TFA) (Sigma) to pH 2-3, and the peptides were purified and desalted using SOLA $\mu$ <sup>TM</sup> reverse phase solid phase extraction plates (Thermo Fisher Scientific), following the manufacturer's instructions. After washing with 50% acetonitrile with 0.1% TFA, the solvents were evaporated using a vacuum concentrator (Genevac, miVac), and the peptides were resuspended in 50  $\mu$ l HPLC-water (Fisher Chemical) containing 2% acetonitrile and 0.1% formic acid (Sigma).

An equivalent sample amount of 1  $\mu$ g peptide was then injected into the column, and the samples were spiked with indexed retention time peptides (iRT) peptides before LC-MS analysis. The LC-MS analysis for neat plasma was conducted using an EASY-nLC 1200 ultra-HPLC system coupled to a Q Exactive HF-X mass spectrometer (Thermo Fisher Scientific) with the following column setting: trap column (PepMap100 C18 3  $\mu$ m; 75  $\mu$ m  $\times$  2 cm; Thermo Fisher Scientific), EASY-Spray column (ES803, column temperature 45 °C; Thermo Fisher Scientific), and linear gradient from 5% to 38% over 90 or 120 minutes at a flow rate of 350 nl/min. The DIA-44 variable windows + 90 min NL gradientnLC was used for LC-MS/MS

analysis. The full MS resolution was set to 60,000 at 200 m/z, and the mass range was set to 350–1650 m/z.

For neat plasma, a spectral library was established using the Pulsar search engine integrated into Spectronaut 15.1 (Biognosys, Schlieren, Switzerland) with the factory default settings. Briefly, peptides from 24 immunodepleted plasma were pooled and fractionated with off-line high-pH reversed-phase chromatography (Thermo Fisher Scientific). The fractions were then subjected to DDA analysis, and the raw DIA and DDA data were loaded directly into Pulsar and searched against the human reference proteome acquired from Uniprot Homo sapiens Database (December 2019, 42,410 entries). The generated library consisted of 15,896 precursors: 8616 peptides, 781 protein groups, and 1272 proteins.

#### *Depleted plasma*

To enhance the detection of medium and low range proteins in plasma, a depletion strategy was employed to remove high abundant proteins. Specifically, 95% of the top 14 most abundant proteins, including HSA, albumin, IgG, IgA, IgM, IgD, IgE kappa and lambda light chains, alpha-1-acid glycoprotein, alpha-1-antitrypsin, alpha-2-macroglobulin, apolipoprotein A1, fibrinogen, haptoglobin, and transferrin, were removed to increase the sensitivity of detection for low abundance proteins. The plasma samples were processed using High Select™ Top14 Abundant Protein Depletion Mini Spin Columns according to the manufacturer's protocol, which involved the use of resins containing highly specific immobilized antibodies. Briefly, four µl plasma was added to the column, mixed for 10 min at room temperature, and the eluent was collected by centrifugation at  $1,000 \times g$  for 2 min.

The depleted plasma was then subjected to digestion using the filter-aided sample preparation (FASP) method. To denature the proteins, 8M urea in 100 mM Ammonium bicarbonate was

used, and disulfide bridges were reduced with freshly prepared 35mM dithiothreitol (DTT). The proteins were then alkylated with 55mM iodoacetamide (IAA) to allow immediate access of the trypsin to the internal cleavage sites. Ultrafiltration facilitated by centrifugation was employed to remove DTT and other low-molecular-weight components. The filters were washed with 100mM Ammonium bicarbonate in between the different steps to ensure the removal of any remaining DTT or IAA.

Prior to protein digestion, the concentration of the protein was measured using the Qubit™ 4 Fluorometer (#Q33239, Thermo Fisher Scientific, Waltham, MA, USA) and the Invitrogen Qubit™ Protein BR Assay Kit (#Q33211, Thermo Fisher Scientific, Waltham, MA, USA). Sequencing Grade Modified Trypsin (1µg/µl, #V5111, Promega, Madison, WI, USA) was added to 30 µg protein for each sample in 100mM ammonium bicarbonate and incubated at 37°C for 16 hours. The digestion was halted by adding 10% trifluoroacetic acid (TFA) (#302031, Sigma- Aldrich, Merck, Darmstadt, Germany), and the pH was checked using pH strips. The peptide concentration was measured using the Nanodrop™ 2000 spectrophotometer (#ThermoND-2000, Fisher Scientific, Waltham, MA, USA) after digestion.

For LC-MS analysis, an equal amount of 1 µg peptide was injected into the column, and the samples were spiked with indexed retention time peptides (iRT) before analysis. The Dionex Ultimate 3000 RSLCnano UPLC coupled to an Exploris 480 mass spectrometer with FAIMS (Thermo Fischer Scientific) was used for LC-MS analysis of depleted plasma. The column settings were as follows: trap column (PN 164535), anal column (ES802A) LC-MS/MS analysis (DIA): DIA-26 variable windows + FAIMS with 2 CVs (-45V & -60V), 90 min NL gradient. nLC: – non-linear gradient, 1 min at 5% B, in 75 min up to 25% B, in 9 min up to 32% B, in 6 min up to 45% B, in 2 min up to 95% B, 5 min at 95% B and 12 min equilibration at 5% B full MS - resolution: 120.000, normalized AGC target: 300%, maxIT: 45 ms, 380-

1100 m/z, DIA – 26 windows with variable width, resolution: 30.000, normalized AGC target: 1000%, maxIT: auto, NCE: 32, centroid.

Due to differences in instrumentation, a separate spectral library was generated for depleted plasma. A total of 10 immunodepleted plasma samples were pooled, fractionated (N=8), and analyzed by DDA (DDA-max speed [1.7s + 1.3s cycle time] FAIMS with two CVs [-45V and -60V], 90 min NL gradient). The generated raw DIA data was combined with the DDA data and searched against Uniprot Homo sapiens Database (July 2020, 42,386 entries) using pulsar. The resulting spectral library generated using Spectronaut 15.1 (Biognosys, Schlieren, Switzerland), contained 17,727 precursors: 12,529 peptides, 1,294 protein groups, and 2,259 proteins.

#### **DIA/SWATH-MS Targeted Data Extraction**

DIA data files were analysed using Spectronaut 14.10.201222.47784 (Biognosys, Schlieren, Switzerland), against the spectral library using the BGS factory default settings. The identifications were filtered at an FDR of 1% at both peptide and protein levels. Spectronaut used retention time prediction based on iRT (28), the m/z dimension in the SWATH-MS data, mass accuracy and isotopic distribution of fragment ions to identify a peptide. For each targeted peptide, all available transitions were extracted, along with their corresponding decoy-transition groups, which were generated by pseudo-reversing the sequence of the targeted peptides.

#### **HIV-1 Subtyping**

HIV-1 env sequences (V1-V3, approximately 940 base pairs) were generated, and the HIV-1 subtype was phylogenetically determined as previously described<sup>1</sup>. Briefly, the general time-reversible (GTR) model of nucleotide substitution with gamma-distributed rate heterogeneity

152 was used to infer maximum likelihood trees. Branch support was assessed using the  
153 approximate likelihood ratio test based on the Shimodaira-Hasegawa (aLRT-SH) method, with  
154 branch support of  $\geq 0.90$  considered significant<sup>2</sup>.

## SUPPLEMENTARY TABLES

**Table S1 | Characteristics of study participants diagnosed with hyperacute HIV-1 infection.** This table presents the demographic and clinical characteristics of individuals diagnosed with hyperacute HIV-1 infection. Key variables include age, sex, and HIV-1 transmission route. Data are summarised for participants included in the study cohort, with total number and percentage for each variable.

| Characteristics                               | Total<br>(N = 54) | Female<br>participants<br>(N = 20) | Male<br>participants<br>(N = 34) |
|-----------------------------------------------|-------------------|------------------------------------|----------------------------------|
| <b>Age in years</b>                           |                   |                                    |                                  |
| <b>Median age (IQR)</b>                       | 24 (22-27)        | 22 (21-24)                         | 26 (22-31)                       |
| <b>Below age 25 (%)</b>                       | 32 (59)           | 15 (75)                            | 17 (50)                          |
| <b>Above age 25 (%)</b>                       | 22 (41)           | 5 (25)                             | 17 (50)                          |
| <b>Country of collection (Site, %)</b>        |                   |                                    |                                  |
| <b>Kenya (Kilifi)</b>                         | 32 (59)           | 3 (15)                             | 29 (85)                          |
| <b>Rwanda (Kigali)</b>                        | 4 (7)             | 2 (10)                             | 2 (6)                            |
| <b>Zambia (Lusaka)</b>                        | 3 (6)             | 0 (0)                              | 3 (9)                            |
| <b>South Africa (Durban)</b>                  | 15 (28)           | 15 (75)                            | 0 (0)                            |
| <b>HIV-1 subtype (%)</b>                      |                   |                                    |                                  |
| <b>A1</b>                                     | 31 (57)           | 5 (25)                             | 26 (76)                          |
| <b>A2D</b>                                    | 1 (2)             | 0 (0)                              | 1 (3)                            |
| <b>C</b>                                      | 20 (37)           | 15 (75)                            | 5 (15)                           |
| <b>D</b>                                      | 1 (2)             | 0 (0)                              | 1 (3)                            |
| <b>G</b>                                      | 1 (2)             | 0 (0)                              | 1 (3)                            |
| <b>Risk group (%)</b>                         |                   |                                    |                                  |
| <b>DC</b>                                     | 7 (13)            | 2 (10)                             | 5 (15)                           |
| <b>HET</b>                                    | 19 (35)           | 18 (90)                            | 1 (3)                            |
| <b>MSM</b>                                    | 28 (52)           | 0 (0)                              | 28 (82)                          |
| <b>Median time in days from EDI (IQR)</b>     |                   |                                    |                                  |
| <b>Pre-infection (V0)</b>                     | 62 (28-106)       | 59 (41-92)                         | 71 (22-113)                      |
| <b>After-Infection – Fiebig stage I (V1)</b>  | 10 (7-14)         | 7 (7-10)                           | 9 (10-14)                        |
| <b>After-Infection – Fiebig stage II (V2)</b> | 31 (28-37)        | 29 (28-31)                         | 32 (29-39)                       |

Abbreviations: HIV-1, human immunodeficiency virus type 1; IQR, interquartile range. Risk group data: DC (serodiscordant couples), HET (heterosexual) and MSM (men who have sex with men). Availability of matched pre-infection samples by days from sampling to the estimated date of infection (EDI).



165 **Table S2 | HLA Alleles and disease progression classification across study participants.** This table summarises the distribution of HLA alleles  
166 among study participants and their associated HIV-1 disease progression classifications. Disease progression is categorised as fast or slow, based on  
167 Time to CD4+ T-cell count <500 cells/mm<sup>3</sup> within 12 months from EDI and viral load dynamics over one year.

| ID | sex    | cohort | HLA-A   | HLAA    | HLAB    | HLAB    | HLAC    | HLAC    | VL   | progression |
|----|--------|--------|---------|---------|---------|---------|---------|---------|------|-------------|
| 1  | Female | Durban | A*02:01 | A*30:01 | B*44:03 | B*58:02 | C*04:01 | C*06:02 | high | fast        |
| 2  | Female | Durban | A*68:01 | A*68:02 | B*57:02 | B*58:02 | C*06:02 | C*18:01 | high | fast        |
| 3  | Female | Durban | A*02:01 | A*30:01 | B*15:10 | B*42:02 | C*08:04 | C*17:01 | high | fast        |
| 4  | Male   | IAVI   | A*01:01 | A*30:02 | B*15:03 | B*58:02 | C*02:10 | C*06:02 | high | fast        |
| 5  | Female | IAVI   | A*30:02 | A*74:01 | B*49:01 | B*53:01 | C*04:01 | C*07:01 | high | fast        |
| 6  | Female | Durban | A*03:01 | A*74    | B*15:03 | B*58:02 | C*02:10 | C*06:02 | high | fast        |
| 7  | Female | Durban | A*23:01 | A*68:02 | B*08:01 | B*58:01 | C*03:04 | C*07:01 | high | fast        |
| 8  | Male   | IAVI   | A*34:02 | A*36:01 | B*53:01 | B*53:01 | C*04:01 | C*04:01 | high | fast        |
| 9  | Male   | IAVI   | A*23:01 | A*68:01 | B*07:02 | B*13:02 | C*07:02 | C*16:04 | high | fast        |
| 10 | Male   | IAVI   | A*68:01 | A*68:02 | B*15:10 | B*58:02 | C*03:04 | C*06:02 | high | fast        |
| 11 | Male   | IAVI   | A*68:02 | A*68:02 | B*14:01 | B*15:10 | C*03:04 | C*08:02 | high | fast        |
| 12 | Male   | IAVI   | A*02:01 | A*68:02 | B*27:03 | B*58:01 | C*02:02 | C*03:02 | high | fast        |
| 13 | Male   | IAVI   | A*30:02 | A*36:01 | B*15:03 | B*53:01 | C*02:10 | C*04:01 | high | fast        |
| 14 | Male   | IAVI   | A*68:02 | A*68:02 | B*07:02 | B*53:01 | C*06:02 | C*07:02 | high | fast        |
| 15 | Male   | IAVI   | A*01:01 | A*68:02 | B*07:02 | B*58:01 | C*07:01 | C*07:02 | high | fast        |
| 16 | Male   | IAVI   | A*36:01 | A*74:01 | B*53:01 | B*58:01 | C*04:01 | C*06:02 | high | fast        |
| 17 | Male   | IAVI   | A*02:02 | A*68:02 | B*07:02 | B*15:03 | C*02:10 | C*07:02 | high | fast        |
| 18 | Male   | IAVI   | A*02:01 | A*30:02 | B*15:10 | B*45:01 | C*04:01 | C*16:01 | high | fast        |
| 19 | Male   | IAVI   | A*02:01 | A*30:01 | B*15:03 | B*15:10 | C*03:04 | C*08:02 | high | fast        |
| 20 | Male   | IAVI   | A*01:01 | A*02:02 | B*45:01 | B*58:01 | C*06:02 | C*17:01 | high | fast        |
| 21 | Female | IAVI   | A*30:02 | A*68:02 | B*15:10 | B*45:01 | C*03:04 | C*16:01 | high | fast        |
| 22 | Male   | IAVI   | A*02:01 | A*74:01 | B*51:01 | B*58:02 | C*06:02 | C*16:02 | high | fast        |
| 23 | Male   | IAVI   | A*23:01 | A*29:02 | B*15:03 | B*45:01 | C*02:10 | C*06:02 | high | fast        |

|    |        |        |         |         |         |         |         |         |      |      |
|----|--------|--------|---------|---------|---------|---------|---------|---------|------|------|
| 24 | Male   | IAVI   | A*30:01 | A*30:02 | B*42:01 | B*53:01 | C*04:01 | C*17:01 | high | fast |
| 25 | Female | Durban | A*23:01 | A*74    | B*35:01 | B*58:01 | C*04:01 | C*06:02 | high | fast |
| 26 | Female | Durban | A*23:01 | A*29:02 | B*42:01 | B*53:01 | C*03:04 | C*17    | high | fast |
| 27 | Male   | IAVI   | A*30:02 | A*68:02 | B*14:02 | B*58:01 | C*07:01 | C*08:02 | low  | fast |
| 28 | Female | IAVI   | A*02:01 | A*03:01 | B*15:03 | B*47:01 | C*02:10 | C*06:02 | low  | fast |
| 29 | Male   | IAVI   | n/a     | n/a     | n/a     | n/a     | n/a     | n/a     | low  | fast |
| 30 | Male   | IAVI   | A*30:02 | A*68:02 | B*18:03 | B*73:01 | C*04:01 | C*15:02 | low  | fast |
| 31 | Male   | IAVI   | A*03:01 | A*74:01 | B*47:03 | B*58:01 | C*03:02 | C*07:01 | low  | fast |
| 32 | Female | IAVI   | A*30:01 | A*30:02 | B*42:02 | B*57:03 | C*17:01 | C*18:01 | low  | fast |
| 33 | Male   | IAVI   | A*02:01 | A*34:02 | B*27:03 | B*58:02 | C*02:02 | C*06:02 | low  | fast |
| 34 | Male   | IAVI   | A*02:05 | A*36:01 | B*41:02 | B*53:01 | C*04:01 | C*17:01 | low  | fast |
| 35 | Female | Durban | A*01:01 | A*66:01 | B*39:10 | B*81:01 | C*12:03 | C*18    | low  | fast |
| 36 | Female | Durban | A*43:01 | A*43:01 | B*07:02 | B*15:03 | C*02:10 | C*18    | low  | fast |
| 37 | Male   | IAVI   | A*30:02 | A*68:01 | B*45:01 | B*58:02 | C*04:01 | C*16:01 | n/a  | fast |
| 38 | Female | IAVI   | A*30:02 | A*68:02 | B*15:10 | B*53:01 | C*03:04 | C*04:01 | n/a  | fast |
| 39 | Male   | IAVI   | A*30:01 | A*68:01 | B*37:01 | B*42:01 | C*07:01 | C*17:01 | n/a  | fast |
| 40 | Male   | IAVI   | A*30:02 | A*68:02 | B*07:02 | B*15:03 | C*02:10 | C*07:02 | n/a  | fast |
| 41 | Male   | IAVI   | A*03:01 | A*30:01 | B*15:10 | B*15:47 | C*02:10 | C*03:04 | n/a  | fast |
| 42 | Female | Durban | A*02:05 | A*02:05 | B*58:01 | B*58:01 | C*07:01 | C*07:01 | n/a  | fast |
| 43 | Female | Durban | A*24:02 | A*29:02 | B*07:02 | B*44:03 | C*07:01 | C*07:02 | high | slow |
| 44 | Male   | IAVI   | A*26:01 | A*74:01 | B*35:01 | B*50:01 | C*04:01 | C*06:02 | high | slow |
| 45 | Male   | IAVI   | A*02:01 | A*66:01 | B*15:03 | B*58:02 | C*02:10 | C*06:02 | high | slow |
| 46 | Male   | IAVI   | A*02:01 | A*31:04 | B*07:02 | B*18:01 | C*07:02 | C*07:04 | high | slow |
| 47 | Male   | IAVI   | A*02:05 | A*68:02 | B*15:10 | B*35:01 | C*03:04 | C*04:01 | high | slow |
| 48 | Male   | IAVI   | A*30:01 | A*30:02 | B*14:02 | B*42:01 | C*08:02 | C*17:01 | high | slow |
| 49 | Female | Durban | A*02:05 | A*66:01 | B*14:01 | B*39:10 | C*08:04 | C*12:03 | low  | slow |
| 50 | Female | Durban | A*23:01 | A*30:01 | B*15:10 | B*58:01 | C*03:02 | C*16:01 | low  | slow |
| 51 | Male   | IAVI   | A*02:02 | A*68:02 | B*42:01 | B*53:01 | C*06:02 | C*17:01 | low  | slow |
| 52 | Male   | IAVI   | A*34:02 | A*68:02 | B*07:02 | B*15:03 | C*02:10 | C*07:02 | low  | slow |
| 53 | Female | Durban | A*33:03 | A*68:02 | B*07:02 | B*57:02 | C*07:02 | C*18    | low  | slow |

168

|    |        |        |         |         |         |         |         |         |     |      |
|----|--------|--------|---------|---------|---------|---------|---------|---------|-----|------|
| 54 | Female | Durban | A*30:01 | A*68:02 | B*18:01 | B*58:01 | C*02:02 | C*03:02 | low | slow |
|----|--------|--------|---------|---------|---------|---------|---------|---------|-----|------|

### Table S3 | Differentially expressed proteins between HIV-1 pre-infection and acute

**HIV-1 infection stages of HIV-1.** The table presents a comprehensive description of differentially expressed proteins that were observed during acute stages of HIV-1 infection. Significance was determined using a stringent threshold of  $p < 0.005$ ,  $q < 0.005$ , and  $\log_2FC > 1$  through Linear mixed models, while also ensuring differences were observed in both cohorts. The Protein ID column displays the UniProtKB/Swiss-Prot entry name for each protein, while the Protein description column provides the recommended full protein name from UniProtKB/Swiss-Prot. The Biological process column captures either biological process keywords from UniProtKB/TrEMBL or protein function information provided by the human protein atlas. Secretome location provides information on the predicted location of the protein based on signal peptide and transmembrane region prediction methods listed in HPA, or alternatively, a description of the subcellular location of the mature protein (including isoform locations if available) as described by UNIPROT. Tissue specificity was provided through extracted information from UNIPROT and HPA on the expression of a gene at the mRNA and protein level in cells or tissues of multicellular organisms.

| Protein                       | Protein description                          | Biological process                                               | Secretome location | Tissue specificity          |
|-------------------------------|----------------------------------------------|------------------------------------------------------------------|--------------------|-----------------------------|
| <b>V1-V0: Increased at V1</b> |                                              |                                                                  |                    |                             |
| VWF                           | Von Willebrand factor                        | Blood coagulation, Cell adhesion, Haemostasis                    | Secreted to blood  | Plasma                      |
| FN1                           | Fibronectin 1                                | Acute phase, Angiogenesis, Cell adhesion, Cell shape             | Secreted to blood  | Liver                       |
| <b>V2-V0: Increased at V2</b> |                                              |                                                                  |                    |                             |
| TTN                           | Titin                                        | Cardiac muscle cell development                                  | Leakage            | Cardiac and skeletal muscle |
| VWF                           | Von Willebrand factor                        | Blood coagulation, Cell adhesion, Haemostasis                    | Secreted to blood  | Plasma                      |
| FN1                           | Fibronectin 1                                | Acute phase, Angiogenesis, Cell adhesion, Cell shape             | Secreted to blood  | Liver                       |
| PAPOLA                        | Poly(A) polymerase alpha                     | mRNA processing                                                  | Leakage            | Ubiquitous                  |
| RAB10                         | RAB10, member RAS oncogene family            | Transport                                                        | Leakage            | Hippocampus, testis         |
| FLNA                          | Filamin A                                    | Cilium biogenesis/degradation, actin cytoskeleton reorganisation | Leakage            | Ubiquitous                  |
| HLA-A                         | Major histocompatibility complex, class I, A | Adaptive immunity, Host-virus interaction, Innate immunity       | Leakage            | Ubiquitous                  |
| MYH9                          | Myosin heavy chain 9                         | Cell adhesion, Cell shape                                        | Leakage            | Ubiquitous                  |

**V2-V0: Decreased at V2**

|       |                                   |                                                                 |                                  |                         |
|-------|-----------------------------------|-----------------------------------------------------------------|----------------------------------|-------------------------|
| LTF   | Lactotransferrin                  | Immunity, Ion transport, Osteogenesis, Transcription regulation | Secreted to blood                | Plasma, tears, saliva,  |
| PRDX2 | Peroxiredoxin 2                   | T-cell proliferation                                            | Leakage                          | Ubiquitous              |
| FGL1  | Fibrinogen like 1                 | Adaptive immunity, regulation of T-cell activation              | Secreted to blood                | Liver                   |
| ATF6  | Activating transcription factor 6 | Transcription regulation, Unfolded response                     | Leakage                          | Ubiquitous              |
| CA2   | Carbonic anhydrase 2              | One-carbon metabolic process, carbon dioxide transport          | Leakage                          | Intestine, Stomach      |
| CAT   | Catalase                          | Cellular detoxification of hydrogen peroxide                    | Leakage                          | Liver                   |
| HPN   | Hepsin                            | Negative regulation of apoptotic process                        | Leakage                          | Kidney, liver, pancreas |
| POSTN | Periostin                         | Cell adhesion                                                   | Secreted to extracellular matrix | Stomach, Skin           |
| CA1   | Carbonic anhydrase 1              | One-carbon metabolic process, carbon dioxide transport          | Leakage                          | Intestine, bone marrow  |
| SPTA1 | Spectrin alpha, erythrocytic 1    | Cell shape                                                      | Leakage                          | Bone marrow             |

**V2-V1: Decreased at V1**

|           |                                        |                                                             |                   |                    |
|-----------|----------------------------------------|-------------------------------------------------------------|-------------------|--------------------|
| HNRNPA2B1 | Heterogeneous nuclear ribonucleo A2/B1 | Host-virus interaction, mRNA processing/splicing/ transport | Leakage           | Ubiquitous         |
| PRDX2     | Peroxiredoxin 2                        | T-cell proliferation                                        | Leakage           | Ubiquitous         |
| MANBA     | Mannosidase beta                       | Glyco catabolic process                                     | Leakage           | Ubiquitous         |
| HPN       | Hepsin                                 | Positive regulation by host of viral transcription          | Leakage           | Liver, kidney      |
| CA2       | Carbonic anhydrase 2                   | One-carbon metabolic process, carbon dioxide transport      | Leakage           | Intestine, Stomach |
| CA1       | Carbonic anhydrase 1                   | One-carbon metabolic process, carbon dioxide transport      | Leakage           | Intestine, Stomach |
| SPTA1     | Spectrin alpha, erythrocytic 1         | Cell shape                                                  | Leakage           | Bone marrow        |
| GRN       | Granulin precursor                     | Astrocyte activation involved in immune response            | Secreted to blood | Kidney,            |

185 **Table S4 | Performance measures in predicting ARS across 50 test sets in PLS-DA.**

| <b>model</b>    | <b>ER</b> | <b>acc</b> | <b>auc</b> | <b>TN</b> | <b>TP</b> | <b>FP</b> | <b>FN</b> |
|-----------------|-----------|------------|------------|-----------|-----------|-----------|-----------|
| <b>v0v1v2</b>   | 0.36      | 0.64       | 0.75       | 0.17      | 0.47      | 0.23      | 0.12      |
| <b>v0v10v20</b> | 0.24      | 0.76       | 0.82       | 0.24      | 0.52      | 0.16      | 0.07      |
| <b>v1v2</b>     | 0.46      | 0.54       | 0.69       | 0.13      | 0.41      | 0.28      | 0.18      |
| <b>v10v20</b>   | 0.20      | 0.80       | 0.82       | 0.26      | 0.54      | 0.15      | 0.05      |
| <b>v10</b>      | 0.32      | 0.68       | 0.80       | 0.22      | 0.46      | 0.19      | 0.13      |
| <b>v20</b>      | 0.23      | 0.77       | 0.85       | 0.23      | 0.54      | 0.15      | 0.08      |

186

187 **Table S5 | Proteins associated with acute retroviral syndrome.** The table presents a  
188 comprehensive description of statistically significant proteins at two weeks post HIV-1  
189 infection vs. pre-infection that are associated with ARS. Significance was determined using a  
190 stringent threshold of  $p < 0.005$ ,  $q < 0.005$ , and  $\log_2FC > 1$  through linear mixed modelling, while  
191 also ensuring differences were observed in both cohorts. The Protein ID column displays the  
192 UniProtKB/Swiss-Prot entry name for each protein, while the Protein description column  
193 provides the recommended full protein name from UniProtKB/Swiss-Prot. The Biological  
194 process column captures either biological process keywords from UniProtKB/TrEMBL or  
195 protein function information provided by the human protein atlas. Secretome location provides  
196 information on the predicted location of the protein based on signal peptide and transmembrane  
197 region prediction methods listed in HPA, or alternatively, a description of the subcellular  
198 location of the mature protein (including isoform locations if available) as described by  
199 UNIPROT. Tissue specificity is provided through extracted information from UNIPROT and  
200 HPA on the expression of a gene at the mRNA and protein level in cells or tissues of  
201 multicellular organisms.

| Protein                                           | Protein description                                         | Biological process                                                                   | Secretome location        | Tissue specificity           |
|---------------------------------------------------|-------------------------------------------------------------|--------------------------------------------------------------------------------------|---------------------------|------------------------------|
| <b>V1-V0: Increased more among those with ARS</b> |                                                             |                                                                                      |                           |                              |
| KRT9                                              | Keratin 9                                                   | Epithelial cell differentiation                                                      | Leakage                   | Lymphoid tissue              |
| LILRA3                                            | Leukocyte immunoglobulin-like receptor subfamily A member 3 | Adaptive immune response                                                             | Secreted                  | B-cells, lung                |
| <b>V1-V0: Decreased more among those with ARS</b> |                                                             |                                                                                      |                           |                              |
| SCGB1A1                                           | Secretoglobin family 1A member 1                            | Inflammatory response, negative regulation of IFN-gamma/IL-13/IL-4 production        | Secreted in other tissues | Club cells                   |
| ZYX                                               | Zyxin                                                       | Inflammatory response, Cell adhesion, Host-virus interaction, response to IFN-gamma  | Leakage                   | Ubiquitous                   |
| PPBP                                              | Pro-platelet basic protein                                  | Inflammatory response, Chemotaxis                                                    | Secreted to blood         | Bone marrow, lymphoid tissue |
| FCGR3A                                            | Fc fragment of IgG receptor IIIa                            | ADCC, regulation of immune response, epithelial cell differentiation                 | Secreted to blood         | Plasma                       |
| GSN                                               | Gelsolin                                                    | Cellular response to interferon-gamma, viral entry into host cell, Cilium biogenesis | Secreted to blood         | Plasma                       |

|        |                                      |                                                |          |                       |
|--------|--------------------------------------|------------------------------------------------|----------|-----------------------|
| ICOSLG | Inducible T-cell costimulator ligand | Adaptive immunity, B-cell activation, Immunity | Membrane | Ubiquitous            |
| ECMI   | Extracellular matrix protein 1       | Adaptive immunity, B-cell activation, Immunity | Secreted | Esophagus, epididymis |

**V2-V0: Increased more among those with ARS**

|       |                                   |                                                                                                        |         |                       |
|-------|-----------------------------------|--------------------------------------------------------------------------------------------------------|---------|-----------------------|
| GDI2  | GDP dissociation inhibitor 2      | Signal transduction, vesicle mediated transport                                                        | Leakage | Brain                 |
| GSTO1 | Glutathione S-transferase omega 1 | Positive regulation of skeletal muscle contraction by regulation of release of sequestered calcium ion | Leakage | Ubiquitous            |
| PSMA1 | Proteasome 20S subunit alpha 1    | Inflammatory response, proteasomal protein catabolic process                                           | Leakage | Ubiquitous            |
| TMOD3 | Tropomodulin 3                    | Actin filament organisation                                                                            | Leakage | Ubiquitous            |
| TUBB  | Tubulin beta class I              | Cytoskeleton-dependent intracellular transport                                                         | Leakage | Spleen, thymus, brain |

**V2-V0: Decreased more among those with ARS**

|         |                                              |                                                                               |                           |                              |
|---------|----------------------------------------------|-------------------------------------------------------------------------------|---------------------------|------------------------------|
| C2      | Complement C2                                | Complement activation, innate immunity                                        | Leakage                   | Liver                        |
| CTSS    | Cathepsin S                                  | Adaptive immune response, antigen processing and presentation                 | Leakage                   | Lymphoid tissue, bone marrow |
| HRG     | Histidine rich glycoprotein                  | Fibrinolysis, platelet activation, actin cytoskeleton organization            | Secreted to blood         | Plasma                       |
| ICOSLG  | Inducible T-cell costimulator ligand         | Adaptive immunity, B-cell activation, Immunity                                | Membrane                  | Ubiquitous                   |
| PTPRG   | Protein tyrosine phosphatase receptor type G | Negative regulation of epithelial cell migration                              | Membrane                  | Ubiquitous                   |
| SCGB1A1 | Secretoglobin family 1A member 1             | Inflammatory response, negative regulation of IFN-gamma/IL-13/IL-4 production | Secreted in other tissues | Club cells                   |
| ECMI    | Extracellular matrix protein 1               | Adaptive immunity, B-cell activation, Immunity                                | Secreted                  | Esophagus, epididymis        |



**Table S6 | Association between ARS, clinical parameters, and viral control.** The table displays the results of various tests assessing the association of viral control with several variables, including acute retroviral syndrome (ARS), site, HIV-1 transmission risk group, age, sex, and HIV-1 subtype. Each row represents a specific variable, and the corresponding test was used to evaluate the association between viral controllers and non-viral controllers. Variables investigated include ARS, site, HIV-1 transmission risk group, age, sex, and HIV-1 subtype. The test column lists the several tests used to assess the association between the variable and viral control. The p-value associated with the test (all two-sided), representing the statistical significance of the results and providing evidence of no association, is shown in the last column. The numbers in parentheses indicate the percentage of participants for each variable among viral control groups.

| Variable                | Non-viral controllers | Viral controllers | Test   | p-value |
|-------------------------|-----------------------|-------------------|--------|---------|
| N                       | 30                    | 15                | None   |         |
| <b>ARS=Yes (%)</b>      | 14 (58.3)             | 4 (50)            | Fisher | 0.703   |
| Fever=Yes (%)           | 20 (83.3)             | 4 (50)            | Fisher | 0.152   |
| Headache=Yes (%)        | 13 (54.2)             | 5 (62.5)          | Fisher | 1       |
| Nightsweats=Yes (%)     | 13 (54.2)             | 5 (62.5)          | Fisher | 1       |
| Myalgia=Yes (%)         | 16 (66.7)             | 5 (62.5)          | Fisher | 1       |
| Fatigue=Yes (%)         | 17 (70.8)             | 5 (62.5)          | Fisher | 0.681   |
| Skinrash=Yes (%)        | 0 (0)                 | 1 (12.5)          | Fisher | 0.25    |
| Oralulcers=Yes (%)      | 4 (16.7)              | 2 (25)            | Fisher | 0.625   |
| Pharyngitis=Yes (%)     | 10 (41.7)             | 3 (37.5)          | Fisher | 1       |
| Lymphadenopathy=Yes (%) | 9 (37.5)              | 1 (12.5)          | Fisher | 0.38    |
| Diarrhea=Yes (%)        | 8 (33.3)              | 1 (12.5)          | Fisher | 0.386   |
| Anorexia=Yes (%)        | 16 (66.7)             | 4 (50)            | Fisher | 0.433   |
| <b>Site (%)</b>         |                       |                   | Fisher | 0.338   |
| Durban                  | 6 (20)                | 6 (40)            |        |         |
| Kigali                  | 2 (6.7)               | 2 (13.3)          |        |         |
| Kilifi                  | 20 (66.7)             | 7 (46.7)          |        |         |
| Lusaka                  | 2 (6.7)               | 0 (0)             |        |         |

|                        |              |              |                |        |
|------------------------|--------------|--------------|----------------|--------|
| <b>Risk group (%)</b>  |              |              | Fisher         | 0.337  |
| DC                     | 4 (13.3)     | 2 (13.3)     |                |        |
| HET                    | 8 (26.7)     | 7 (46.7)     |                |        |
| MSM                    | 18 (60)      | 6 (40)       |                |        |
| <b>Sex=Male (%)</b>    | 22 (73.3)    | 7 (46.7)     | Chi square     | 0.152  |
| <b>Age (mean (SD))</b> | 25.52 (6.74) | 27.65 (6.81) | Mann-Whitney U | 0.0766 |
| <b>Subtype (%)</b>     | (%)          |              | Fisher         | 0.649  |
| A1                     | 18 (60)      | 8 (53.3)     |                |        |
| A2D                    | 1 (3.3)      | 0 (0)        |                |        |
| C                      | 10 (33.3)    | 6 (40)       |                |        |
| D                      | 0 (0)        | 1 (6.7)      |                |        |
| G                      | 1 (3.3)      | 0 (0)        |                |        |

214

**Table S7 | Proteins associated with viral control.** The table presents a comprehensive description of statistically significant/ proteins at two weeks post HIV-1 infection vs. pre-infection; one-month post HIV-1 infection vs. pre-infection; one-month vs two-week post HIV-1 infection; that are associated with viral control. To determine significance, a stringent threshold was set at  $p < 0.005$ ,  $q < 0.005$ , and  $\log_2FC > 1$ , while also ensuring differences were observed in both cohorts. The Protein ID column displays the UniProtKB/Swiss-Prot entry name for each protein, while the Protein description column provides the recommended full protein name from UniProtKB/Swiss-Prot. The Biological process column captures either biological process keywords from UniProtKB/TrEMBL or protein function information provided by the human protein atlas. Secretome location provides information on the predicted location of the protein based on signal peptide and transmembrane region prediction methods listed in HPA, or alternatively, a description of the subcellular location of the mature protein (including isoform locations if available) as described by UNIPROT. Tissue specificity is provided through extracted information from UNIPROT and HPA on the expression of a gene at the mRNA and protein level in cells or tissues of multicellular organisms.

| Protein                                              | Protein description                            | Biological process                                     | Secretome location | Tissue specificity |
|------------------------------------------------------|------------------------------------------------|--------------------------------------------------------|--------------------|--------------------|
| <b>V1-V0: Increased more among viral controllers</b> |                                                |                                                        |                    |                    |
| NAPA                                                 | NSF attachment protein alpha                   | ER-Golgi transport,<br>Protein transport               | Leakage            |                    |
| <b>V2-V0: Increased more among viral controllers</b> |                                                |                                                        |                    |                    |
| NAPA                                                 | NSF attachment protein alpha                   | ER-Golgi transport,<br>Protein transport               | Leakage            |                    |
| RAN                                                  | GTP-binding nuclear protein Ran                | Host-virus interaction,<br>protein export from nucleus | Leakage            | Plasma             |
| <b>V2-V0: Decreased among viral controllers</b>      |                                                |                                                        |                    |                    |
| ITIH4                                                | Inter-alpha-trypsin inhibitor heavy<br>chain 4 | Acute phase                                            | Secreted to blood  | Liver              |
| <b>V2-V1: Increased among viral controllers</b>      |                                                |                                                        |                    |                    |
| RAN                                                  | GTP-binding nuclear protein Ran                | Host-virus interaction,<br>protein export from nucleus | Leakage            | Plasma             |

**Table S8 | Proteins associated with disease progression.** The table presents a comprehensive description of statistically significant/ proteins at two weeks post HIV-1 infection vs. pre-infection; one-month post HIV-1 infection vs. pre-infection; one-month vs two-week post HIV-1 infection; that are associated with disease progression. To determine significance, a stringent threshold was at  $p < 0.005$ ,  $q < 0.005$ , and  $\log_2 FC > 1$ , while also ensuring differences were observed in both cohorts. The Protein ID column displays the UniProtKB/Swiss-Prot entry name for each protein, while the Protein description column provides the recommended full protein name from UniProtKB/Swiss-Prot. The Biological process column captures either biological process keywords from UniProtKB/TrEMBL or protein function information provided by the human protein atlas. Secretome location provides information on the predicted location of the protein based on signal peptide and transmembrane region prediction methods listed in HPA, or alternatively, a description of the subcellular location of the mature protein (including isoform locations if available) as described by UNIPROT. Tissue specificity is provided through extracted information from UNIPROT and HPA on the expression of a gene at the mRNA and protein level in cells or tissues of multicellular organisms.

| Protein                                                                                | Protein description                             | Biological process                                                      | Secretome location         | Tissue specificity |
|----------------------------------------------------------------------------------------|-------------------------------------------------|-------------------------------------------------------------------------|----------------------------|--------------------|
| <b>V1-V0: Increase increases risk of progression /Increased among fast progressors</b> |                                                 |                                                                         |                            |                    |
| HPN                                                                                    | Hepsin                                          | Positive regulation by host of viral transcription                      | Membrane                   | Liver, kidney      |
| PRKCB                                                                                  | Protein kinase C beta                           | Adaptive immunity, apoptosis, transcription regulation                  | Leakage                    |                    |
| APOC4                                                                                  | Apolipoprotein C4                               | Lipid transport, transport                                              | Secreted to blood          | Liver, plasma      |
| PSMB6                                                                                  | Proteasome 20S subunit beta 6                   | Host-virus interaction                                                  | Leakage                    |                    |
| TXNDC5                                                                                 | Thioredoxin domain containing 5                 | Negative regulation of apoptotic process, protein folding               | Intracellular and membrane |                    |
| CRHBP                                                                                  | Corticotropin releasing hormone binding protein | Inflammatory response                                                   | Secreted to blood          |                    |
| <b>V1-V0: Decrease increases risk of progression /Decreased among fast progressors</b> |                                                 |                                                                         |                            |                    |
| GSTM2                                                                                  | Glutathione S-transferase mu 2                  | Regulation of release of sequestered calcium ion                        | Leakage                    | Muscle             |
| <b>V2-V0: Increase increases risk of progression /Increased among fast progressors</b> |                                                 |                                                                         |                            |                    |
| ITGB3                                                                                  | Integrin subunit beta 3                         | Cell adhesion, host-virus interaction                                   | Intracellular and membrane |                    |
| DDTL                                                                                   | D-dopachrome tautomerase-like                   |                                                                         | Leakage                    |                    |
| UBB                                                                                    | Ubiquitin B                                     | Protein ubiquitination                                                  | Leakage                    |                    |
| HSPA8                                                                                  | Heat shock protein family A (Hsp70) member 8    | Host-virus interaction, mRNA processing, stress response, transcription | Leakage                    | Ubiquitous         |

**V2-V0: Decrease increases risk of progression /Decreased among fast progressors**

|       |                                                          |                                                              |                                  |                       |
|-------|----------------------------------------------------------|--------------------------------------------------------------|----------------------------------|-----------------------|
| CD84  | CD84 molecule                                            | Adaptive immunity, autophagy, cell adhesion, innate immunity | Leakage                          | Hematopoietic tissues |
| LTBP1 | Latent transforming growth factor beta binding protein 1 | Regulation of transforming growth factor beta activation     | Secreted to extracellular matrix | Heart                 |

**V2-V1: Increase increases risk of progression /Increased among fast progressors**

|       |                                              |                                                                              |                   |        |
|-------|----------------------------------------------|------------------------------------------------------------------------------|-------------------|--------|
| CLU   | Clusterin                                    | Apoptosis, complement pathway, innate immunity                               | Secreted to blood | Plasma |
| C7    | Complement C7                                | Complement alternate pathway, complement pathway, cytolysis, innate immunity | Secreted to blood | Plasma |
| C4BPA | Complement component 4 binding protein alpha | Complement pathway, innate immunity                                          | Secreted to blood | Plasma |

**V2-V1: Decrease increases risk of progression /Decreased among fast progressors**

|          |                                        |                                                                                                             |                             |                                          |
|----------|----------------------------------------|-------------------------------------------------------------------------------------------------------------|-----------------------------|------------------------------------------|
| OAF      | Out at first homolog                   |                                                                                                             | Secreted - unknown location |                                          |
| PEPD     | Peptidase D                            | Collagen degradation                                                                                        |                             |                                          |
| PPIF     | Peptidylprolyl isomerase F             | Apoptosis, necrosis                                                                                         | Leakage                     |                                          |
| CD84     | CD84 molecule                          | Adaptive immunity, autophagy, cell adhesion, immunity, innate immunity                                      | Membrane                    | Hematopoietic tissues                    |
| CLIC1    | Chloride intracellular channel 1       | Ion transport, transport                                                                                    | Leakage                     | Heart, placenta, liver, kidney, pancreas |
| SLTM     | SAFB like transcription modulator      | Apoptosis, transcription, transcription regulation                                                          | Leakage                     |                                          |
| FOXA1    | Forkhead box A1                        | Transcription, transcription regulation                                                                     | Leakage                     |                                          |
| RTN4     | Reticulon 4                            | Neurogenesis                                                                                                | Membrane                    |                                          |
| ALOX12   | Arachidonate 12-lipoxygenase, 12S type | Fatty acid metabolism, lipid metabolism                                                                     | Leakage                     | Vascular smooth muscle cell              |
| SERPIND1 | Serpin family D member 1               | Blood coagulation, chemotaxis, haemostasis                                                                  | Secreted to blood           | Liver, plasma                            |
| APOB     | Apolipoprotein B                       | Cholesterol metabolism, lipid metabolism, lipid transport, steroid metabolism, sterol metabolism, transport | Secreted to blood           |                                          |

247 **Table S9 | Model parameters for the different analyses: Time differences, ARS, viral control, and disease progression.** This table outlines  
 248 the model parameters used in the analysis of Acute Retroviral Syndrome (ARS), viral load, and disease progression, assessed through linear  
 249 regression and Cox regression models. Parameters include predictor variables, coefficients, hazard ratios, confidence intervals, and p-values for each  
 250 model. ARS and viral load were evaluated as continuous and categorical variables, while disease progression was classified into relevant categories  
 251 (e.g., slow, rapid).

| Model type         | Model equation                                                                                                                                                                            | Model tested on visit                     | Dependent variable                  | Predictor variable                                                | Covariates        | Accuracy | AUROC | Misclassification error | Sample size per cohort                       | Inclusion/Exclusion criteria                                                                      | Scale/measure                                                                                                              |
|--------------------|-------------------------------------------------------------------------------------------------------------------------------------------------------------------------------------------|-------------------------------------------|-------------------------------------|-------------------------------------------------------------------|-------------------|----------|-------|-------------------------|----------------------------------------------|---------------------------------------------------------------------------------------------------|----------------------------------------------------------------------------------------------------------------------------|
| Linear mixed model | $\text{Protein}_{ij} = \beta_0 + \beta_1 \text{Visit} + \beta_2 \text{Cohort} + \beta_3 \text{Age} + \text{Visit:Cohort} + \text{PC} + \text{P2} + u_i$<br>(Random effect for individual) | V0<br>V1<br>V2<br>V1-V0<br>V2-V0<br>V2-V1 | Individual protein expression level | Visit/<br>timepoints<br>V0<br>V1<br>V2<br>V1-V0<br>V2-V0<br>V2-V1 | Age<br><br>Cohort |          |       |                         | N = 52<br><br>Durban: 15<br><br>IAVI: N = 37 | Excluded:<br>Incomplete data<br><br>Included:<br>Only patients with an protein values at V0,V1,V2 | Expression levels (log2)<br><br>Visit: categorical<br><br>Age: continuous<br><br>Individuals: 52 (2 missing data at V1/V2) |

252

253 Model parameters for ARS analysis

| Model type   | Model equation                                                                                                                                           | Model tested on visit                                    | Dependent variable                  | Predictor variable  | Covariates        | Accuracy | AUROC                                     | Misclassification error | Sample size per cohort                                        | Inclusion/Exclusion criteria                                                        | Scale/measure                                                         |
|--------------|----------------------------------------------------------------------------------------------------------------------------------------------------------|----------------------------------------------------------|-------------------------------------|---------------------|-------------------|----------|-------------------------------------------|-------------------------|---------------------------------------------------------------|-------------------------------------------------------------------------------------|-----------------------------------------------------------------------|
| PLS-DA       | NA                                                                                                                                                       | V0+V1+V2<br>V0+V10+V20<br>V1+V2<br>V10+V20<br>V10<br>V20 | Protein Expression profiles         | ARS status (binary) | Age<br><br>Cohort | 78% (CV) | 0.82 (average computed over 50 test sets) |                         | Durban : NA<br><br>IAVI: N = 33<br><br>(ARS+ = 20, ARS- = 13) | Excluded: Incomplete data<br><br>Included: Only patients with an ARS value from LCA | Expression levels (log2)<br><br>ARS: Yes or No<br><br>Age: continuous |
| Linear model | $\text{Protein}_{ij} = \beta_0 + \beta_1 \text{ARS} + \beta_2 \text{Visit} + \beta_3 \text{Age} + \text{ARS:Visit} + u_i$ (Random effect for individual) | V0<br>V1<br>V2<br>V1-V0<br>V2-V0<br>V2-V1                | Individual protein expression level | ARS status (binary) | Age               |          |                                           |                         | Durban : NA<br><br>IAVI: N = 33<br><br>(ARS+ = 20, ARS- = 13) | Excluded: Incomplete data<br><br>Included: Only patients with an ARS value from LCA | Expression levels (log2)<br><br>ARS: Yes or No<br><br>Age: continuous |

254

255 Model parameters for viral control analysis

| Model type   | Model equation                                                                                                                                                         | Model tested on visit                     | Dependent variable                  | Predictor variable     | Covariates        | Accuracy | AUROC | Misclassification error | Sample size per cohort                                                                                                               | Inclusion/Exclusion criteria                                                                                                                       | Scale/measure                                                                                      |
|--------------|------------------------------------------------------------------------------------------------------------------------------------------------------------------------|-------------------------------------------|-------------------------------------|------------------------|-------------------|----------|-------|-------------------------|--------------------------------------------------------------------------------------------------------------------------------------|----------------------------------------------------------------------------------------------------------------------------------------------------|----------------------------------------------------------------------------------------------------|
| Linear model | $\text{Protein}_{ij} = \beta_0 + \beta_1 \text{VL} + \beta_2 \text{Visit} + \beta_3 \text{Age} + \text{VL} \cdot \text{Visit} + u_i$<br>(Random effect for individual) | V0<br>V1<br>V2<br>V1-V0<br>V2-V0<br>V2-V1 | Individual protein expression level | Viral control (binary) | Age<br><br>Cohort |          |       |                         | N = 45<br>(high = 30,<br>Low = 15)<br><br>Durban:<br>N = 12<br>(high = 6,<br>Low = 6)<br><br>IAVI: N = 33<br>(high = 24,<br>Low = 9) | Excluded:<br>Incomplete data,<br>without VL results from 1-12 months post EDI<br><br>Included:<br>Only patients with an protein values at V0,V1,V2 | Expression levels (log2)<br><br>Viralcontrol: binary<br><br>Age: continuous<br><br>Individuals: 52 |

256



257 Model parameters for disease progression analysis

| Model type     | Model equation | Model tested on visit                     | Dependent variable                  | Predictor variable                                                                                 | Covariates                   | Accuracy | AUROC | Misclassification error | Sample size per cohort                                                                                                      | Inclusion/Exclusion criteria                               | Scale/measure                                                                                             |
|----------------|----------------|-------------------------------------------|-------------------------------------|----------------------------------------------------------------------------------------------------|------------------------------|----------|-------|-------------------------|-----------------------------------------------------------------------------------------------------------------------------|------------------------------------------------------------|-----------------------------------------------------------------------------------------------------------|
| Cox regression |                | V0<br>V1<br>V2<br>V1-V0<br>V2-V0<br>V2-V1 | Individual protein expression level | Event: Time to cd4_abs<500 from 6 weeks after EDI (binary: Progressed-fast vs not progressed-Slow) | Age<br><br>Cohort<br><br>Sex |          |       |                         | N = 54<br>(fast = 42, slow = 12)<br><br>Durban: N = 15<br>(fast = 10, slow = 5)<br><br>IAVI: N = 39<br>(high = 32, Low = 7) | Included: Only patients with an protein values at V0,V1,V2 | Expression levels (log2)<br><br>Disease progression: binary<br><br>Age: continuous<br><br>Individuals: 52 |

258

260 Fig. S1 | Protein pre-processing and quality control results.

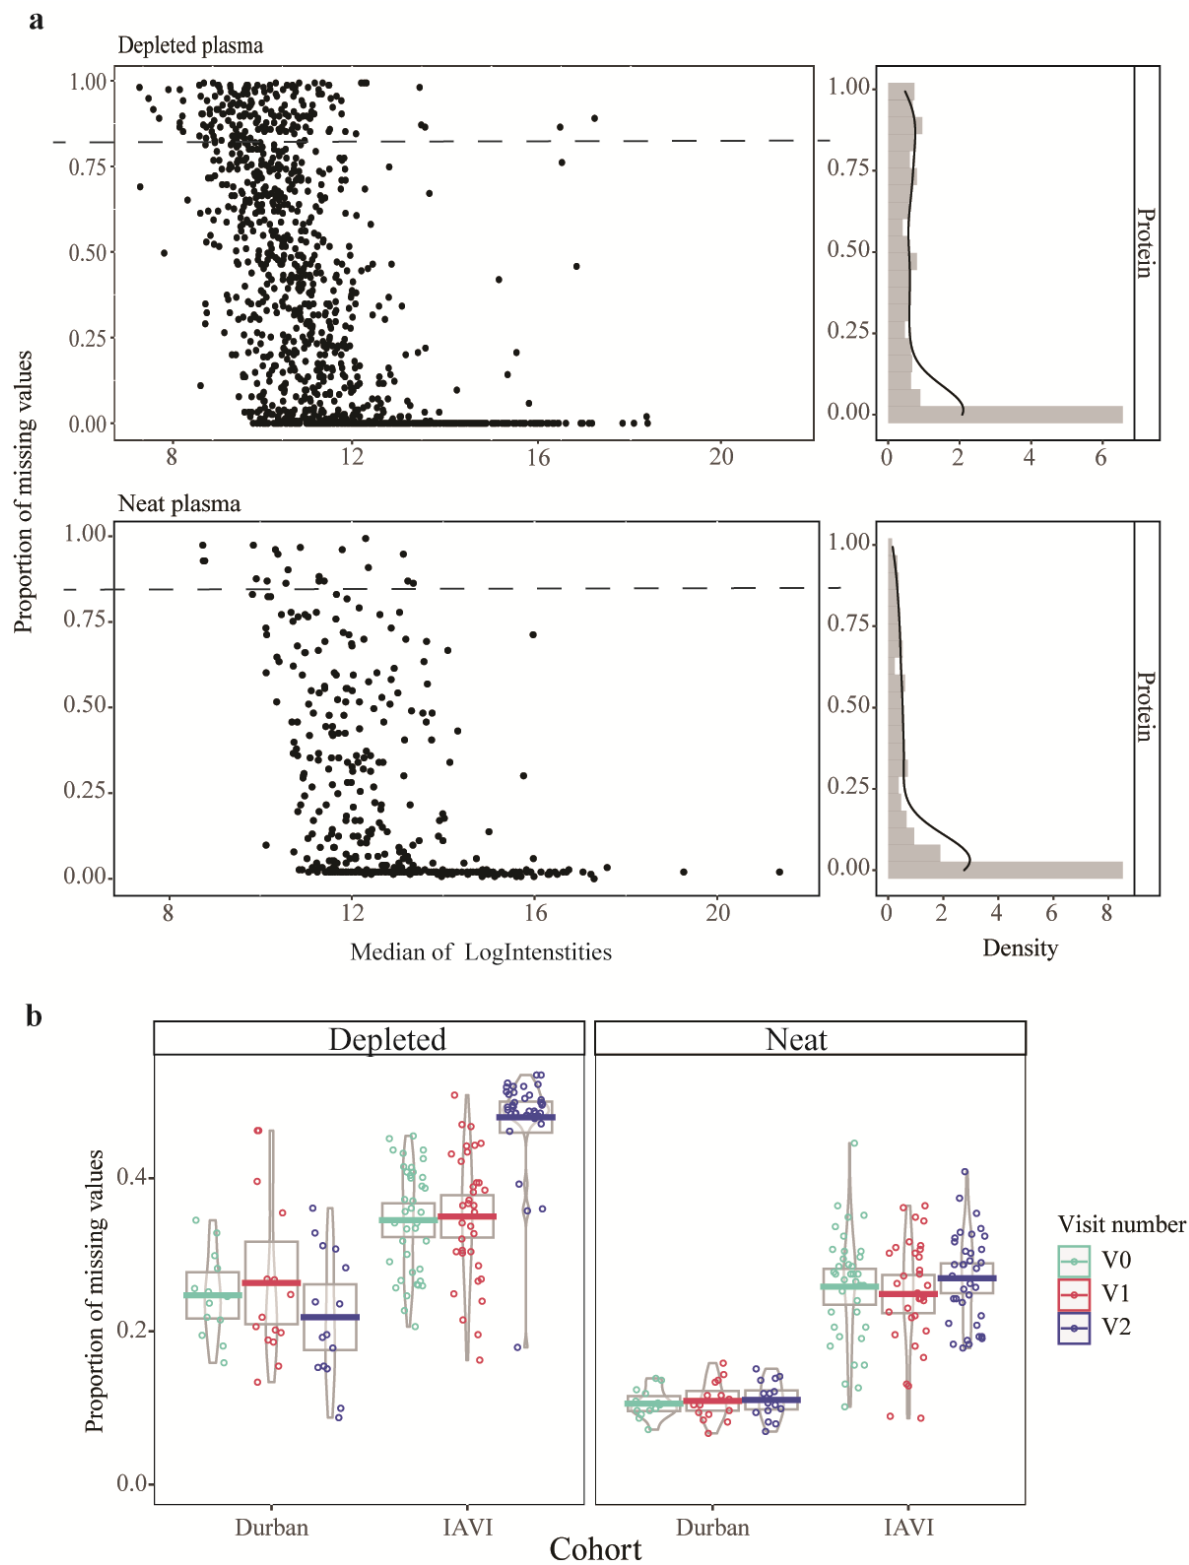

261

262 Fig. S1 | Protein pre-processing and quality control results. a, Scatterplot depicting the

263 protein-wise relationship between median intensities and the proportion of missing values for

264 each sample preparation type in the left panel. Histograms illustrating the frequencies of the  
265 proportion are presented alongside with density plots to the right. Protein-wise investigation  
266 revealed inverse correlation indicating that proteins with lower median signals generally  
267 exhibited more missing values. These trends align with the assumption of missing values are  
268 not at random in DIA/SWATH data. **b**, Plot representing the proportion of missing values  
269 across cohorts. The IAVI cohort showed higher missingness across all time points when  
270 compared to the Durban cohort in both depleted and neat plasma samples ( $p < 0.005$ ; Welch  
271 Two Sample t-test). Abbreviations: V0, visit 0 (collected before estimated date of infection);  
272 V1, visit 1 (collected 10-14 days post estimated date of infection); V2, visit 2 (collected 15-42  
273 days before estimated date of infection); IAVI, International AIDS Vaccine Initiative.

**Fig. S2 | Longitudinal plasma proteome based on mean protein intensities.**

**a**

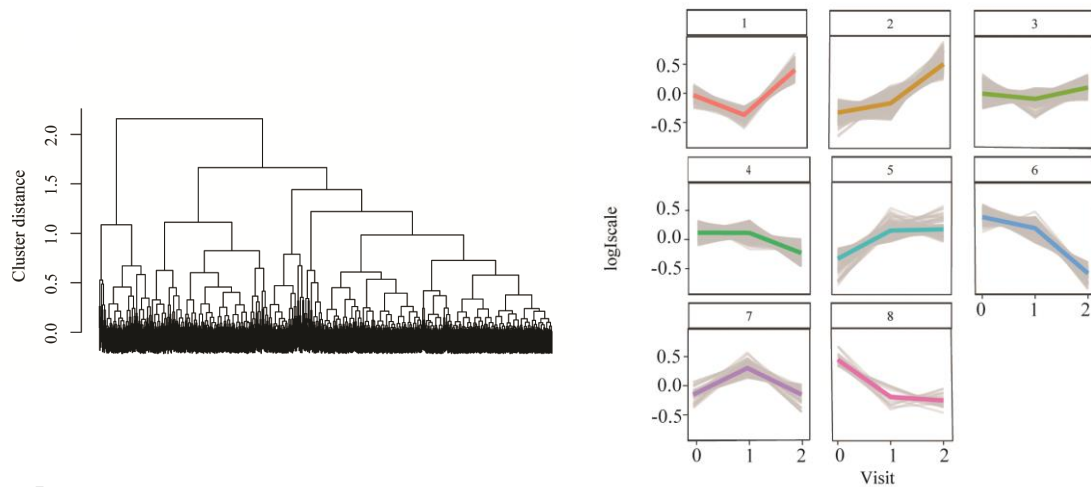

**b**

| Cluster | Depleted | Neat | Enriched biological processes                                                                                                                                |
|---------|----------|------|--------------------------------------------------------------------------------------------------------------------------------------------------------------|
| 1       | 79       | 19   | cell adhesion<br>extracellular structure organisation                                                                                                        |
| 2       | 215      | 31   | Epithelial cell /kidney development<br>complement activation<br>cellular extravasation<br>viral entry into host cell<br>extracellular structure organisation |
| 3       | 227      | 157  | blood coagulation, fibrin clot formation<br>regulation of glucose metabolic process<br>intermediate filament cytoskeleton organisation                       |
| 4       | 179      | 111  | activation of immune response<br>complement activation<br>pyruvate metabolic process<br>cytoskeleton organisation and protein transport                      |
| 5       | 85       | 22   | blood coagulation, fibrin clot formation<br>acute-phase response<br>activation of immune response                                                            |
| 6       | 121      | 14   | cytoskeleton organisation<br>ubiquitin-dependent protein catabolic process<br>regulation of apoptosis<br>regulation of cellular biosynthetic process         |
| 7       | 37       | 19   | acute-phase response<br>activation of immune response                                                                                                        |
| 8       | 14       | 6    | positive regulation of programmed cell death<br>blood coagulation, fibrin clot formation<br>negative regulation of hydrolase activity                        |

278  
279 **Fig. S2 | Longitudinal plasma proteome based on mean protein intensities. a,** Dendrogram  
280 illustrating hierarchical clustering with complete linkage for longitudinal protein expression  
281 profiles during AHI. The dendrogram was based on the mean protein expression profiles across  
282 all 54 patients i.e., 1336 protein combination values from all three time points were analysed.  
283 Optimal clusters, indicative of distinct longitudinal expression profiles, were identified using  
284 the elbow method, resulting in eight clusters. These clusters were then color-coded and plotted,  
285 with the x-axis representing the visit number and the y-axis reflecting the scaled mean log-  
286 intensity per protein. **b,** Summary of the number of proteins in both depleted and neat; and  
287 enriched biological process terms per cluster.

**Fig. S3 | Protein expression different between cohorts.**

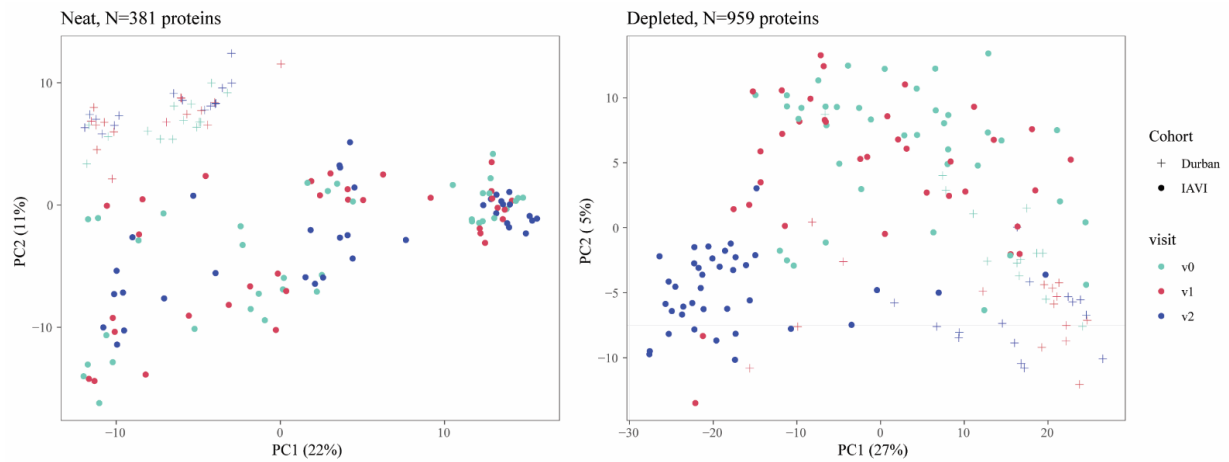

**Fig. S3 | Protein expression different between cohorts.** PCA plot illustrating protein expression profiles in AHI samples longitudinally collected from 54 participants across two cohorts. The x- and y- axes represent PCA 1 and 2, respectively, with the explained percentage variance indicated on the axis labels in bracket. Cohorts are distinguished by different symbols: “+” for the Durban cohort and “o” for the IAVI cohort. To preprocess the protein expression data, missing values imputed by replacing each with a randomly chosen value between one and the minimum of the protein that has the missing value. The data was then log-2 transformed and normalised using the Cyclic Loess method (normalizeCyclicLoess function in limma package v3.50.0) as determined by NormalyzerDE. Abbreviations: V0, visit 0 (collected before estimated date of infection); V1, visit 1 (collected 10-14 days post estimated date of infection); V2, visit 2 (collected 15-42 days before estimated date of infection); IAVI, International AIDS Vaccine Initiative. PC, principal component.

**Fig. S4 | Acute HIV-1 associated tissue damage signatures.**

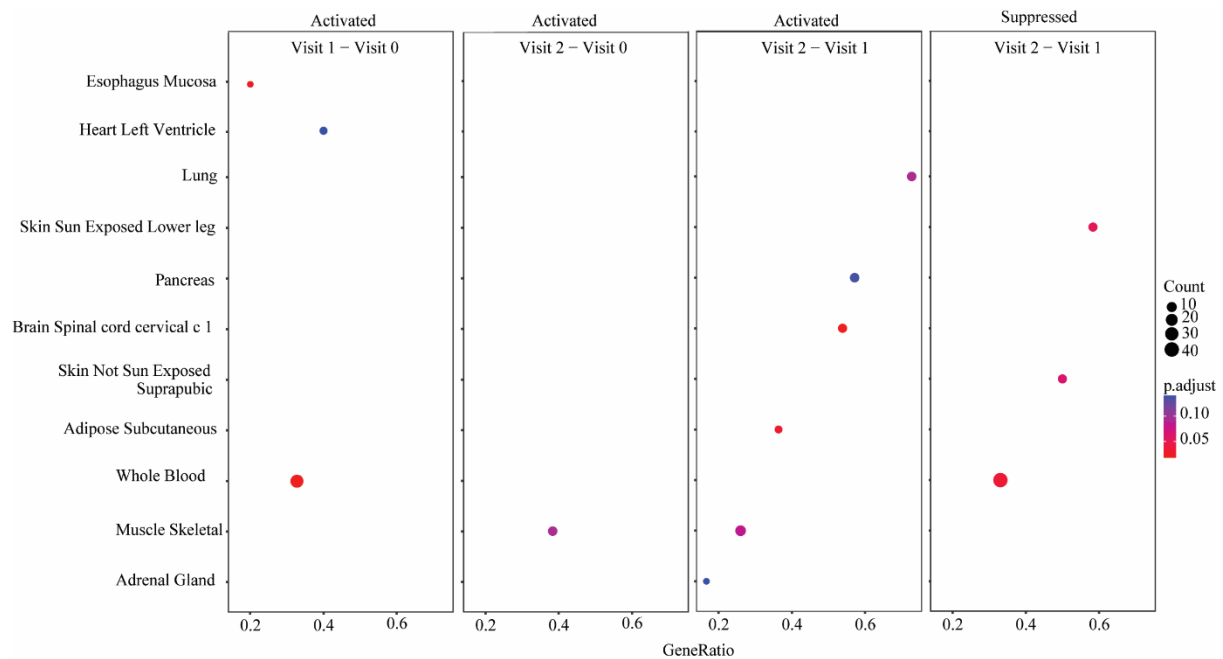

**Fig. S4 | Acute HIV-1 associated tissue damage signatures.** Dot plot illustrating the results of gene set enrichment analysis for tissue damage signatures obtained using a tissue damage library. Each dot represents a gene set and is positioned based on its enrichment score and statistical significance. The size of the dot corresponds to the significance of enrichment, with larger dots indicating higher significance. The color of the dot represents the adjusted p-value associated with the protein set. Dots located below the significance threshold ( $p < 0.05$ ) indicate positive enrichment, signifying overrepresentation of the gene set in the analysed data. The tissue damage signatures are displayed on the y-axis, while the x-axis represents the Protein/GeneRatio. Visit 0, collected before estimated date of infection; visit 1, collected 10-14 days post estimated date of infection; and visit 2, collected 15-42 days before estimated date of infection.

**Fig. S5 | Classification of disease progression.**

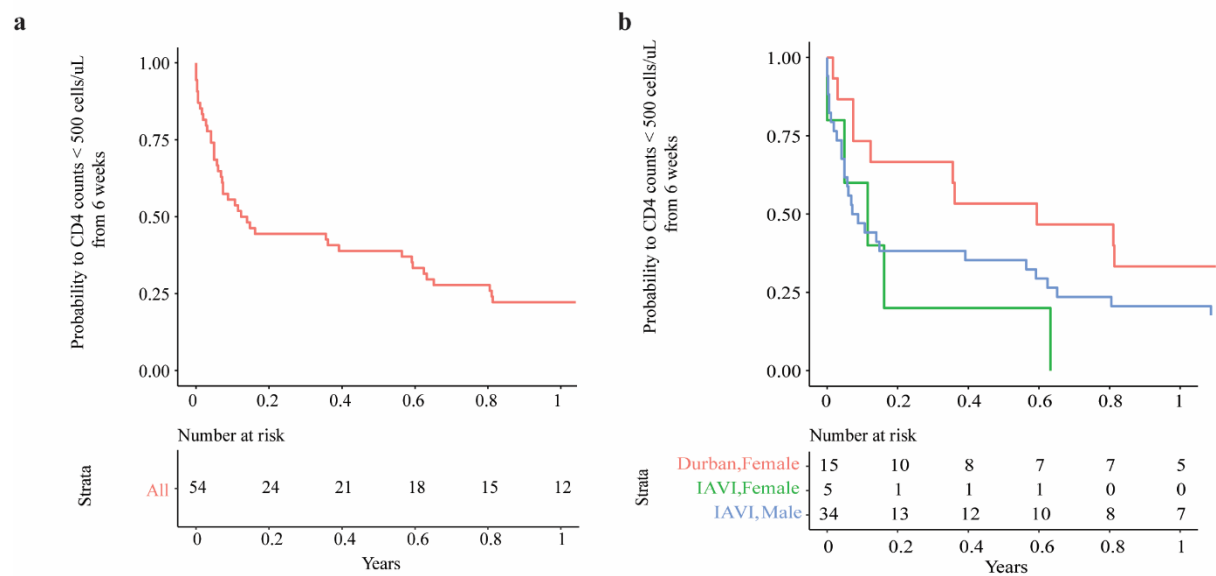

**Fig. S5 | Classification of disease progression. a**, Kaplan-Meier plot displaying the estimated probability of survival against time to CD4+ T-cell counts <500 cells/μl, starting from six weeks post estimated date of infection to ART start date. The number of study participants at risk at regular time intervals is shown at the bottom of the figure. **b**, Kaplan-Meier plot displaying the differences in survival between female and male study participants. A p-value of 0.08 from the Log-rank test is indicative of no significant difference in survival between female and male participants.



325   **REFERENCES**

- 326   1       Esbjornsson, J., Mild, M., Mansson, F., Norrgren, H. & Medstrand, P. HIV-1 Molecular  
327       Epidemiology in Guinea-Bissau, West Africa: Origin, Demography and Migrations.  
328       *PLoS ONE* **6**, doi:10.1371/journal.pone.0017025 (2011).
- 329   2       Guindon, S. *et al.* New Algorithms and Methods to Estimate Maximum-Likelihood  
330       Phylogenies: Assessing the Performance of PhyML 3.0. *Systematic biology* **59**, 307-  
331       321, doi:10.1093/sysbio/syq010 (2010).
